# Supplementary material for: A gene silencing screen uncovers diverse tools for targeted gene repression in Arabidopsis
Source: PubMed Central journal article supplement (PMC10027610; doi:10.1038/s41477-023-01362-8), 2023-03-06

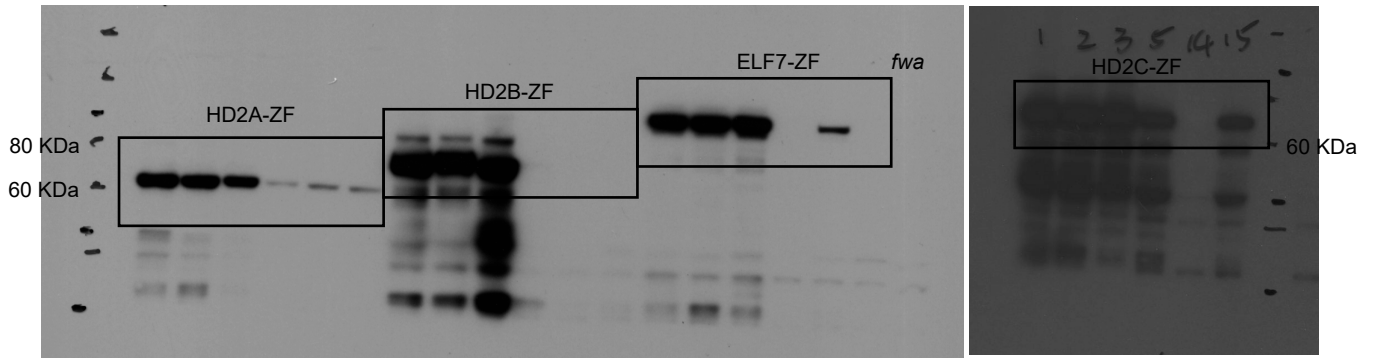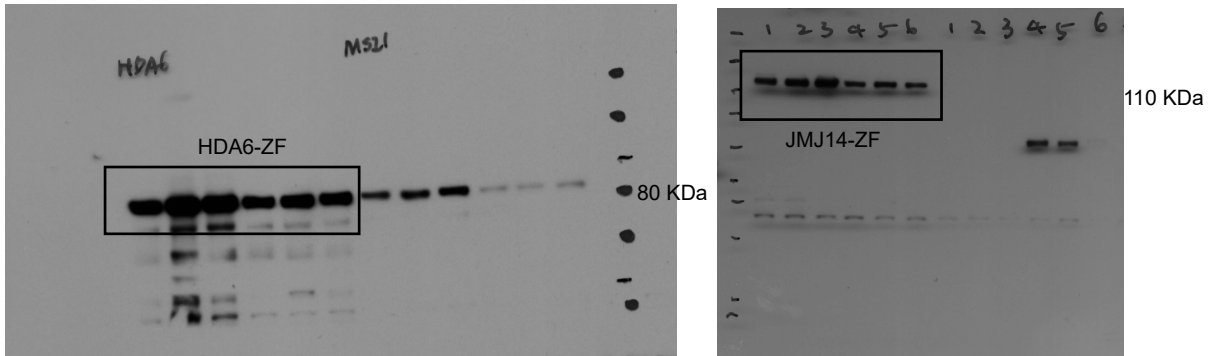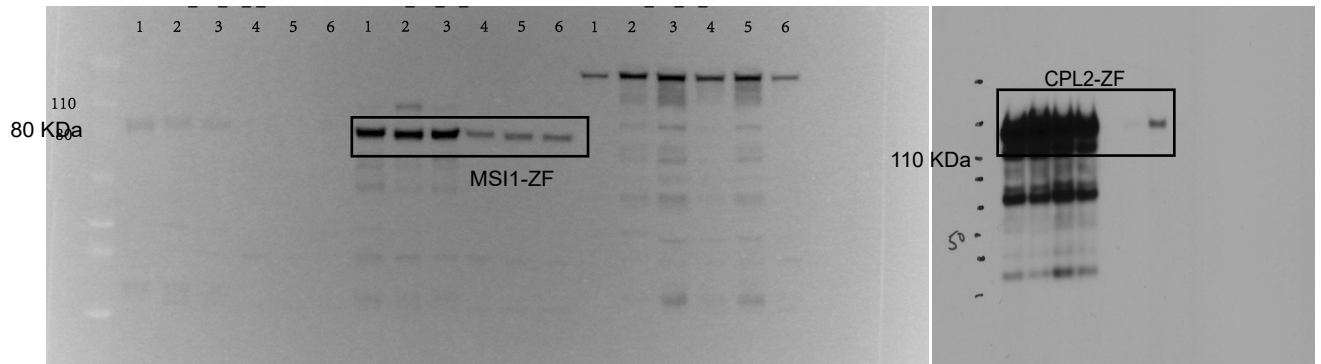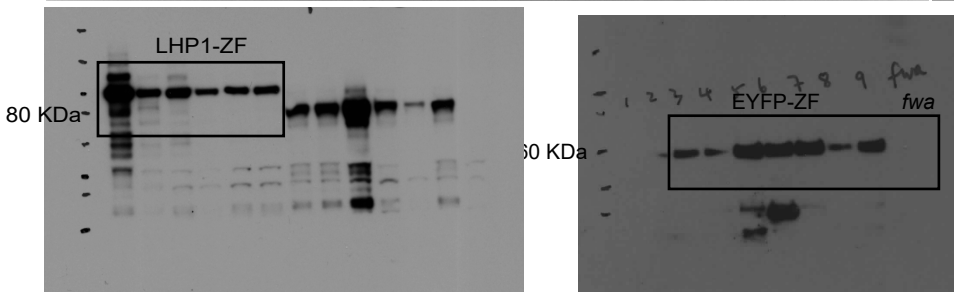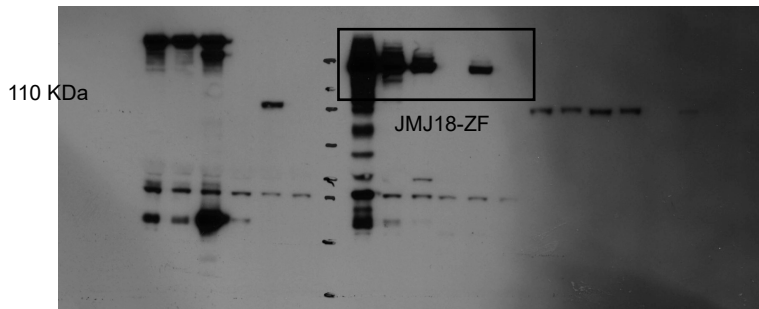

Supplement: 41477_2023_1362_MOESM5_ESM.pdf [file 41477_2023_1362_MOESM5_ESM.pdf]
